# Supplementary material for: Inorganic–organic hybrid polyoxovanadates based on [V4O12]4− or [VO3]22− clusters: controllable synthesis, crystal structures and catalytic properties in selective oxidation of sulfides
Source: Royal Society of Chemistry journal article supplement (doi:10.1039/d0dt03015e), 2020-01-01
Supplement: d0dt03015e1.pdf [file d0dt03015e1.pdf]

Supporting Information for

# Inorganic-Organic Hybrid Polyoxovanadates Based on $[V_4O_{12}]^{4-}$ or $[VO_3]_2^{2-}$ Clusters: Controllable Synthesis, Crystal Structures and Catalytic Properties in Selective Oxidation of Sulfides

Jikun Li, Chuanping Wei, Daigaojie Guo, Congcong Wang, Yinfeng Han, Guofang He, Jianping Zhang, Xianqiang Huang, and Changwen Hu

E-mail address: [lijk0212@163.com](mailto:lijk0212@163.com), [cwhu@bit.edu.cn](mailto:cwhu@bit.edu.cn)

## Table of contents

**Table S1.** Bond valance sum calculations for complexes **1-3**.

**Table S2.** Selected Bond lengths [Å] and angles [°] for complexes **1-3**.

**Figure S1.** The  $[Co_2O_2]$  square plane structure unit in complex **3**.

**Figure S2.** The FT-IR spectra of complex **1**.

**Figure S3.** The FT-IR spectra of complex **2**.

**Figure S4.** The FT-IR spectra of complex **3**.

**Figure S5.** The FT-IR spectra of complex **1** after each catalytic cycle.

**Figure S6.** The simulated, experimental and after three catalytic cycles PXRD patterns of complex **1**.

Simulation based on the SXRD data.

**Figure S7.** The simulated (black) and experimental (red) PXRD patterns of complex **2**. Simulation based on the SXRD data.

**Figure S8.** The simulated (black) and experimental (red) PXRD patterns of complex **3**. Simulation based on the SXRD data.

**S9.** Atomic absorption analysis of product solution after three catalytic cycles.

**Figure S10.** The crystal structure of  $Ni(1-vIM)_4Cl_2$ .

**Figure S11.** The crystal structure of  $[Co_4(1-vIM)_{14}][V_4O_{12}]_2 \cdot 6H_2O$  (**4**).

**S12.** The crystallographic data of  $[Co_4(1-vIM)_{14}][V_4O_{12}]_2 \cdot 6H_2O$  (**4**).

**Table S1.** Bond valence sum calculations for complexes **1-3**.<sup>[a][1-3]</sup>

|          |                             |      |      |      |      |
|----------|-----------------------------|------|------|------|------|
| <b>1</b> | <b>V site</b>               | V1   | V2   | V3   | V4   |
|          | <b>BVS (V<sup>IV</sup>)</b> | 4.99 | 5.08 | 4.99 | 4.94 |
|          | <b>BVS (V<sup>V</sup>)</b>  | 5.26 | 5.35 | 5.26 | 5.19 |
|          | <b>assigned O.S.</b>        | 5    | 5    | 5    | 5    |
| <b>2</b> | <b>V site</b>               | V1   | V2   | V3   | V4   |
|          | <b>BVS (V<sup>IV</sup>)</b> | 5.02 | 5.07 | 5.16 | 5.03 |
|          | <b>BVS (V<sup>V</sup>)</b>  | 5.28 | 5.34 | 5.43 | 5.30 |
|          | <b>assigned O.S.</b>        | 5    | 5    | 5    | 5    |
| <b>3</b> | <b>V site</b>               | V1   | V2   | -    | -    |
|          | <b>BVS (V<sup>IV</sup>)</b> | 4.78 | 4.85 | -    | -    |
|          | <b>BVS (V<sup>V</sup>)</b>  | 5.03 | 5.11 | -    | -    |
|          | <b>assigned O.S.</b>        | 5    | 5    | -    | -    |

[a] The calculations were performed twice for each individual vanadium atom using bond-valence parameters presented by Brese and O'Keefe. The oxidation state of atom *i* is given by  $\sum v_{ij} = V$  with  $v_{ij} = \exp[(R_{ij} - d_{ij})/b]$ . Here *b* is taken to be a 'universal' constant equal to 0.37 Å,  $v_{ij}$  is the valence of a bond between two atoms *i* and *j*,  $R_{ij}$  is the empirical parameter, and  $d_{ij}$  is the observed bond length.

**Table S2.** Selected Bond lengths [Å] and angles [°] for complexes **1-3**.

| Complex 1                                                                                                                           |            |                    |            |
|-------------------------------------------------------------------------------------------------------------------------------------|------------|--------------------|------------|
| Ni(1)-N(1)                                                                                                                          | 2.081(3)   | Ni(1)-N(3)         | 2.108(3)   |
| Ni(1)-O(1)                                                                                                                          | 2.033(3)   | Ni(2)-N(5)         | 2.074(3)   |
| Ni(2)-O(2)                                                                                                                          | 2.068(3)   | Ni(2)-O(13)        | 2.107(3)   |
| Ni(3)-N(7)                                                                                                                          | 2.111(3)   | Ni(3)-N(9)         | 2.093(3)   |
| Ni(3)-O(6)                                                                                                                          | 2.028(3)   | Ni(4)-O(8)         | 2.064(3)   |
| Ni(4)-N(13)                                                                                                                         | 2.090(4)   | Ni(4)-N(11)        | 2.107(3)   |
| V(1)-O(1)                                                                                                                           | 1.638(3)   | V(1)-O(2)          | 1.643(3)   |
| V(1)-O(3)                                                                                                                           | 1.773(3)   | V(1)-O(4)          | 1.778(3)   |
| V(2)-O(5)                                                                                                                           | 1.626(4)   | V(2)-O(6)          | 1.633(3)   |
| V(2)-O(7)                                                                                                                           | 1.750(4)   | V(2)-O(3)          | 1.800(3)   |
| V(3)-O(9)                                                                                                                           | 1.628(4)   | V(3)-O(8)          | 1.639(3)   |
| V(3)-O(7)                                                                                                                           | 1.781(4)   | V(3)-O(10)         | 1.792(3)   |
| V(4)-O(11)                                                                                                                          | 1.630(3)   | V(4)-O(12)         | 1.636(3)   |
| V(4)-O(10)                                                                                                                          | 1.783(3)   | V(4)-O(4)          | 1.812(3)   |
| O(1)-Ni(1)-N(1)#1                                                                                                                   | 89.21(12)  | O(1)-Ni(1)-N(1)    | 90.79(12)  |
| O(1)-Ni(1)-N(3)#1                                                                                                                   | 89.68(12)  | N(1)-Ni(1)-N(3)#1  | 87.36(14)  |
| O(1)-Ni(1)-N(3)                                                                                                                     | 90.32(12)  | O(2)-Ni(2)-N(5)#2  | 89.10(13)  |
| O(2)-Ni(2)-N(5)                                                                                                                     | 90.90(13)  | O(2)-Ni(2)-O(13)   | 90.06(11)  |
| N(5)-Ni(2)-O(13)                                                                                                                    | 90.67(12)  | O(6)-Ni(3)-N(9)#3  | 89.82(13)  |
| O(6)-Ni(3)-N(9)                                                                                                                     | 90.18(13)  | O(6)-Ni(3)-N(7)    | 89.52(13)  |
| O(8)-Ni(4)-N(13)                                                                                                                    | 88.54(14)  | O(8)#4-Ni(4)-N(13) | 91.46(14)  |
| O(1)-V(1)-O(2)                                                                                                                      | 108.83(14) | O(1)-V(1)-O(3)     | 108.64(15) |
| O(1)-V(1)-O(4)                                                                                                                      | 107.16(14) | O(2)-V(1)-O(4)     | 110.87(15) |
| O(5)-V(2)-O(6)                                                                                                                      | 109.14(18) | O(5)-V(2)-O(7)     | 111.1(3)   |
| O(5)-V(2)-O(3)                                                                                                                      | 111.03(16) | O(9)-V(3)-O(8)     | 108.42(18) |
| O(8)-V(3)-O(7)                                                                                                                      | 109.2(2)   | O(7)-V(3)-O(10)    | 110.60(17) |
| O(11)-V(4)-O(12)                                                                                                                    | 108.4(2)   | O(11)-V(4)-O(10)   | 110.57(18) |
| O(11)-V(4)-O(4)                                                                                                                     | 109.70(18) | V(1)-O(1)-Ni(1)    | 176.43(18) |
| V(1)-O(2)-Ni(2)                                                                                                                     | 155.52(18) | V(1)-O(3)-V(2)     | 143.8(2)   |
| V(1)-O(4)-V(4)                                                                                                                      | 133.05(17) | V(2)-O(7)-V(3)     | 153.2(2)   |
| V(4)-O(10)-V(3)                                                                                                                     | 137.19(19) | V(3)-O(8)-Ni(4)    | 175.45(19) |
| Symmetry transformations used to generate equivalent atoms: #1 -x+2,-y+1,-z+1; #2 -x+1,-y+1,-z+1; #3 -x+2,-y+1,-z; #4 -x+1,-y+2,-z. |            |                    |            |
| Complex 2                                                                                                                           |            |                    |            |
| Cu(1)-N(1)                                                                                                                          | 1.999(4)   | Cu(1)-N(3)         | 2.018(4)   |
| Cu(1)-O(1)                                                                                                                          | 2.422(4)   | Cu(2)-N(7)         | 1.999(4)   |
| Cu(2)-N(5)                                                                                                                          | 2.015(4)   | Cu(3)-N(9)         | 1.993(5)   |
| Cu(3)-N(11)                                                                                                                         | 2.032(5)   | Cu(3)-O(9)         | 2.379(4)   |
| Cu(4)-N(15)                                                                                                                         | 1.999(5)   | Cu(4)-N(13)        | 2.001(5)   |
| V(1)-O(2)                                                                                                                           | 1.614(4)   | V(1)-O(1)          | 1.635(4)   |
| V(1)-O(4)                                                                                                                           | 1.797(4)   | V(2)-O(6)          | 1.600(5)   |
| V(2)-O(5)                                                                                                                           | 1.637(4)   | V(2)-O(3)          | 1.784(4)   |

|                     |            |                   |            |
|---------------------|------------|-------------------|------------|
| V(2)-O(7)           | 1.810(5)   | V(3)-O(9)         | 1.616(4)   |
| V(3)-O(8)           | 1.639(4)   | V(3)-O(10)        | 1.764(4)   |
| V(3)-O(7)           | 1.769(4)   | V(4)-O(11)        | 1.617(4)   |
| V(4)-O(12)          | 1.630(4)   | V(4)-O(10)        | 1.777(5)   |
| V(4)-O(4)           | 1.811(4)   | N(1)-Cu(1)-N(3)#1 | 90.63(17)  |
| N(1)-Cu(1)-N(3)     | 89.37(17)  | N(1)#1-Cu(1)-O(1) | 88.00(15)  |
| N(1)-Cu(1)-O(1)     | 92.00(15)  | N(3)-Cu(1)-O(1)   | 87.20(16)  |
| N(7)#2-Cu(2)-N(5)   | 89.96(18)  | N(7)-Cu(2)-N(5)   | 90.04(18)  |
| N(5)-Cu(2)-N(5)#2   | 180.0(2)   | N(9)-Cu(3)-N(9)#3 | 180.00(1)  |
| N(9)-Cu(3)-N(11)#3  | 88.90(19)  | N(9)-Cu(3)-N(11)  | 91.10(19)  |
| N(9)-Cu(3)-O(9)#3   | 89.64(18)  | N(9)-Cu(3)-O(9)   | 90.36(18)  |
| N(11)-Cu(3)-O(9)    | 92.83(17)  | N(15)-Cu(4)-N(13) | 92.0(2)    |
| N(15)-Cu(4)-N(13)#4 | 88.0(2)    | O(2)-V(1)-O(1)    | 108.0(2)   |
| O(2)-V(1)-O(3)      | 110.0(2)   | O(1)-V(1)-O(3)    | 109.2(2)   |
| O(1)-V(1)-O(4)      | 111.4(2)   | O(3)-V(1)-O(4)    | 109.13(17) |
| O(6)-V(2)-O(5)      | 111.6(3)   | O(6)-V(2)-O(3)    | 111.3(2)   |
| O(5)-V(2)-O(3)      | 107.78(19) | O(6)-V(2)-O(7)    | 110.7(3)   |
| O(9)-V(3)-O(8)      | 106.8(2)   | O(9)-V(3)-O(10)   | 111.0(3)   |
| O(8)-V(3)-O(10)     | 109.4(3)   | O(9)-V(3)-O(7)    | 111.1(2)   |
| O(8)-V(3)-O(7)      | 107.1(2)   | O(10)-V(3)-O(7)   | 111.2(2)   |
| O(11)-V(4)-O(12)    | 106.9(3)   | O(11)-V(4)-O(10)  | 109.3(3)   |
| O(12)-V(4)-O(10)    | 113.2(3)   | O(11)-V(4)-O(4)   | 110.7(2)   |
| O(12)-V(4)-O(4)     | 106.7(2)   | O(10)-V(4)-O(4)   | 109.9(2)   |
| V(1)-O(1)-Cu(1)     | 170.0(2)   | V(2)-O(3)-V(1)    | 135.2(2)   |
| V(1)-O(4)-V(4)      | 137.5(2)   | V(3)-O(7)-V(2)    | 137.9(3)   |
| V(3)-O(9)-Cu(3)     | 169.7(3)   | V(3)-O(10)-V(4)   | 154.6(4)   |

Symmetry transformations used to generate equivalent atoms: #1 -x+1,-y+1,-z+1; #2 -x+2,-y,-z+1;  
#3 -x+1,-y+2,-z; #4 -x+1,-y+1,-z.

### Complex 3

|                   |            |                   |            |
|-------------------|------------|-------------------|------------|
| Co(1)-N(1)        | 2.045(2)   | Co(1)-O(5)#1      | 2.0662(16) |
| Co(1)-O(2)#2      | 2.0687(16) | Co(1)-O(2)#3      | 2.1283(16) |
| Co(1)-O(7)        | 2.1498(17) | Co(1)-O(6)        | 2.1522(16) |
| V(1)-O(3)         | 1.5951(17) | V(1)-O(2)         | 1.7073(16) |
| V(1)-O(4)         | 1.8041(16) | V(1)-O(1)         | 1.8071(17) |
| V(2)-O(5)         | 1.6519(16) | V(2)-O(6)         | 1.6738(16) |
| V(2)-O(1)         | 1.7623(16) | V(2)-O(4)#3       | 1.7807(16) |
| N(1)-Co(1)-O(5)#1 | 92.46(7)   | N(1)-Co(1)-O(2)#2 | 97.67(7)   |
| N(1)-Co(1)-O(2)#3 | 177.00(7)  | N(1)-Co(1)-O(7)   | 91.70(8)   |
| O(5)#1-Co(1)-O(7) | 89.56(7)   | N(1)-Co(1)-O(6)   | 96.37(7)   |
| O(2)#2-Co(1)-O(6) | 91.70(6)   | O(7)-Co(1)-O(6)   | 171.59(6)  |
| O(3)-V(1)-O(2)    | 108.04(8)  | O(3)-V(1)-O(4)    | 106.55(9)  |
| O(2)-V(1)-O(4)    | 108.21(8)  | O(3)-V(1)-O(1)    | 106.73(8)  |
| O(2)-V(1)-O(1)    | 113.35(8)  | O(4)-V(1)-O(1)    | 113.60(8)  |
| O(5)-V(2)-O(6)    | 110.89(8)  | O(5)-V(2)-O(1)    | 111.65(8)  |
| O(6)-V(2)-O(1)    | 108.86(8)  | O(5)-V(2)-O(4)#3  | 109.18(8)  |
| O(1)-V(2)-O(4)#3  | 108.16(8)  | V(2)-O(1)-V(1)    | 150.80(10) |
| V(1)-O(2)-Co(1)#2 | 138.38(9)  | V(1)-O(2)-Co(1)#4 | 118.02(8)  |
| V(2)#4-O(4)-V(1)  | 131.53(9)  | V(2)-O(5)-Co(1)#5 | 140.71(10) |
| V(2)-O(6)-Co(1)   | 126.36(8)  |                   |            |

Symmetry transformations used to generate equivalent atoms: #1 -x,y+1/2,-z+1/2; #2 -x,-y+1,-z+1;  
#3 x,y+1,z,-z; #4 x,y-1,z; #5 -x,y-1/2,-z+1/2.

**Figure S1.** The  $[\text{Co}_2\text{O}_2]$  square plane structure unit in complex 3.

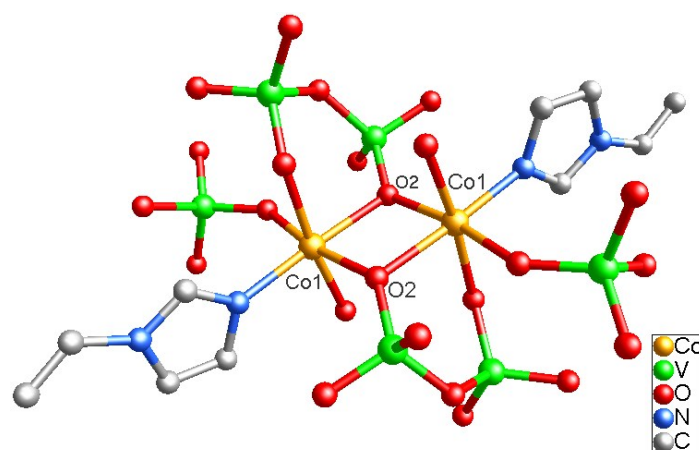

**Figure S2.** The FT-IR spectra of complex 1.

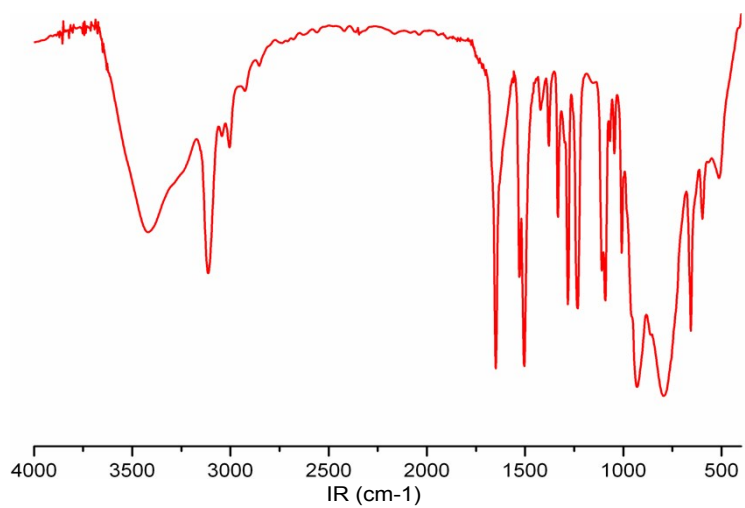

**Figure S3.** The FT-IR spectra of complex 2.

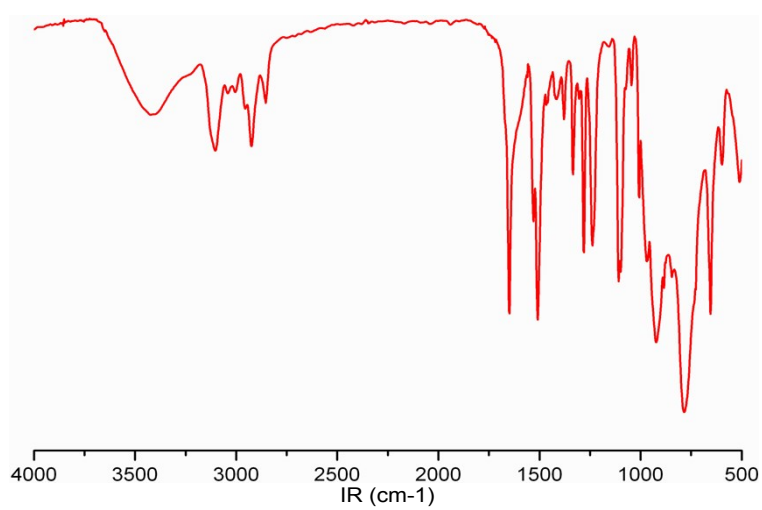

**Figure S4.** The FT-IR spectra of complex **3**.

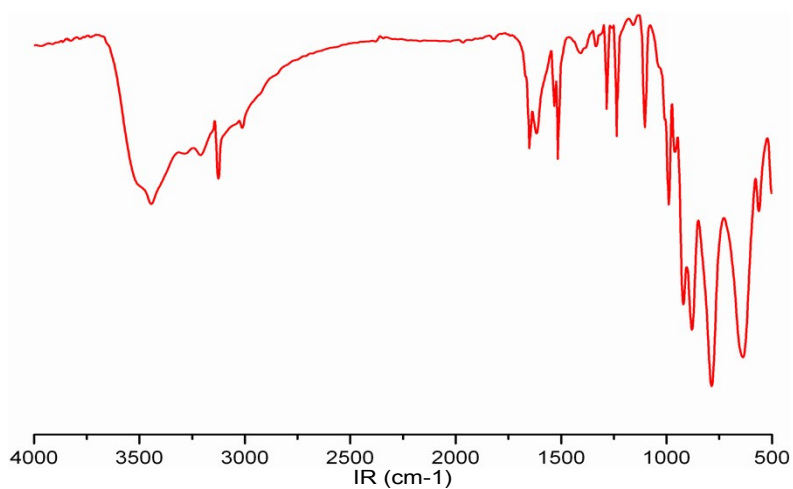

**Figure S5.** The FT-IR spectra of complex **1** after each catalytic cycle.

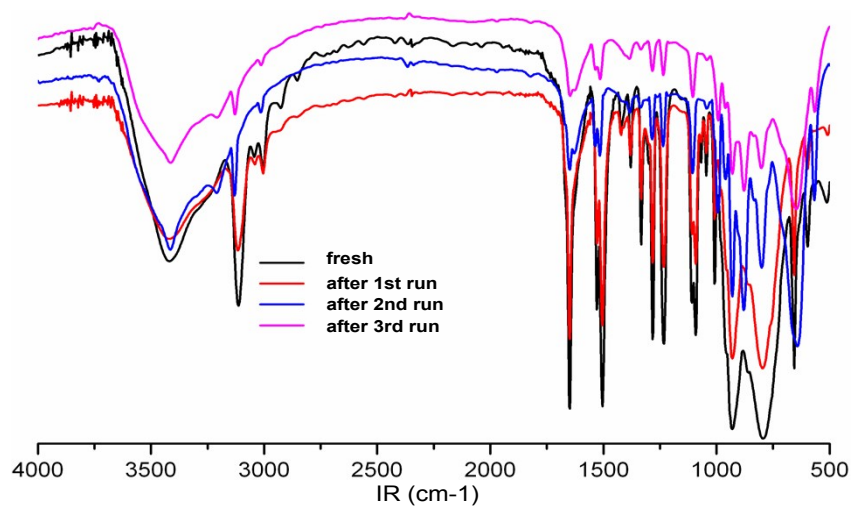

**Figure S6.** The simulated, experimental and after three catalytic cycles PXRD patterns of complex **1**. Simulation based on the SXRD data.

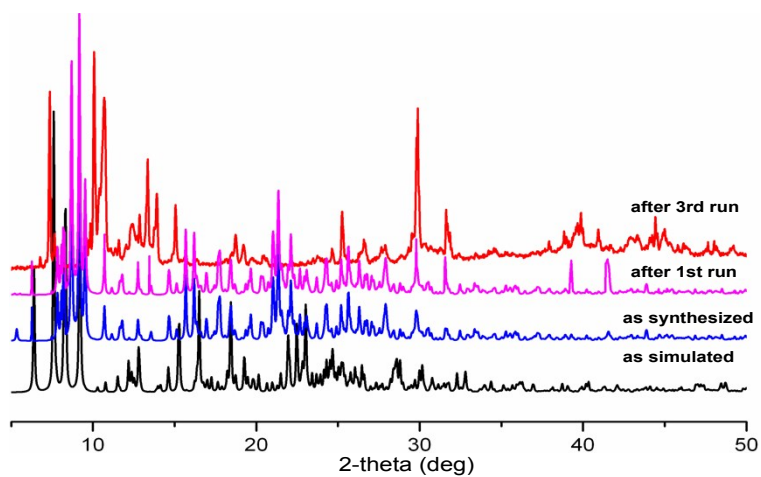

**Figure S7.** The simulated (black) and experimental (red) PXRD patterns of complex **2**. Simulation based on the SXRD data.

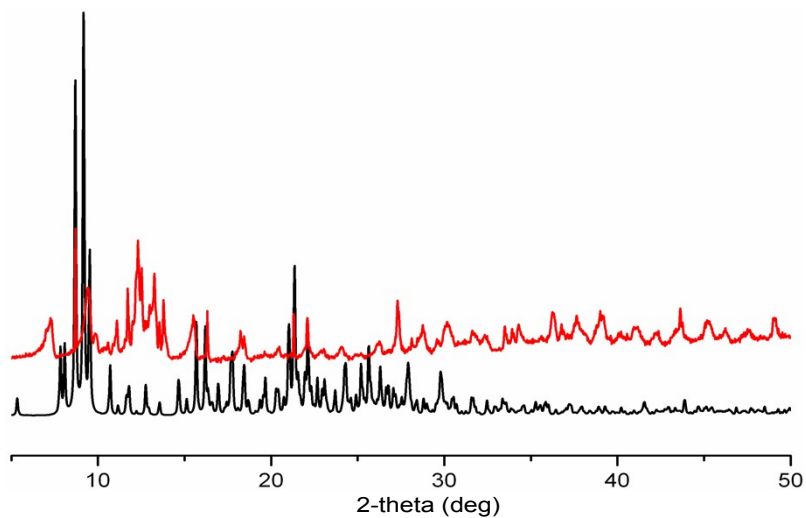

**Figure S8.** The simulated (black) and experimental (red) PXRD patterns of complex **3**. Simulation based on the SXRD data.

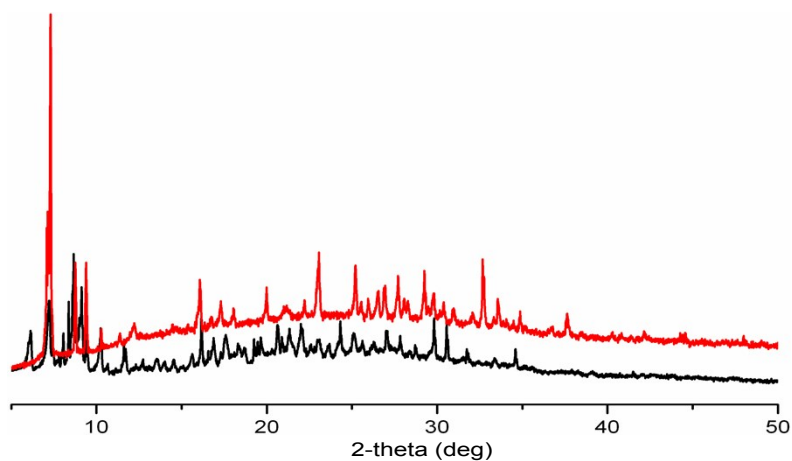

**S9.** Atomic absorption analysis of product solution after three catalytic cycles.

The detection limit of the inductively coupled plasma spectrometer (ICP-AES) on a SPECTRO ARCOS EOP analyzer is 0.002mg/L.

**Figure S10.** The crystal structure of  $\text{Ni}(\text{1-vIM})_4\text{Cl}_2$  (CCDC No. 1881006).

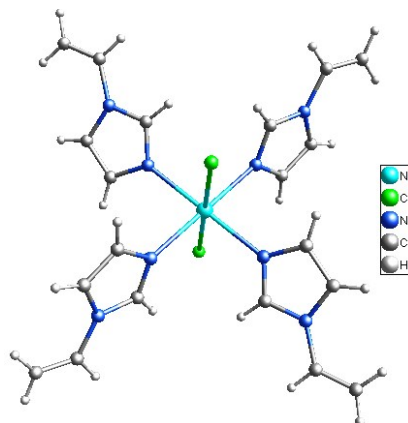

**Figure S11.** The crystal structure of complex  $[\text{Co}_4(1\text{-vIM})_{14}][\text{V}_4\text{O}_{12}]_2 \cdot 6\text{H}_2\text{O}$  (**4**) (CCDC No. 1887006). a) Asymmetrical structural unit; b) Molecular structure.

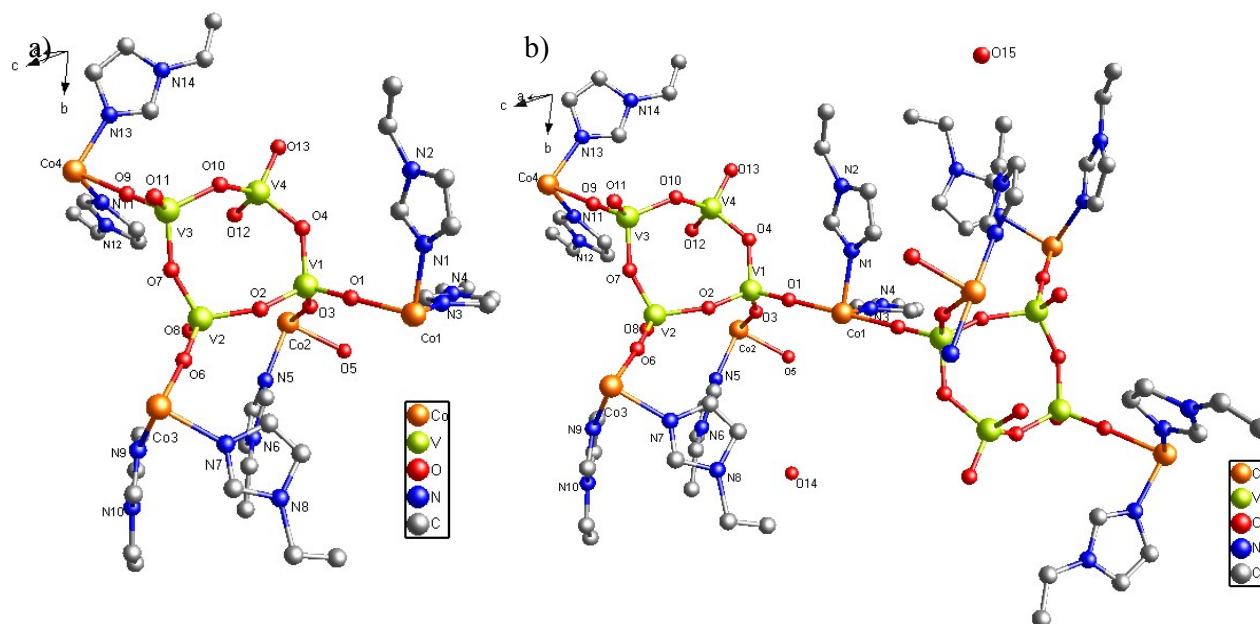

**S12.** The crystallographic data of complex  $[\text{Co}_4(1\text{-vIM})_{14}][\text{V}_4\text{O}_{12}]_2 \cdot 6\text{H}_2\text{O}$  (**4**).

Formula:  $\text{C}_{70}\text{H}_{95}\text{N}_{28}\text{O}_{30}\text{Co}_4\text{V}_8$ ;  $M_r=2451.97$ ; Crystal system: Triclinic; Space group:  $P-1$ ;  $a=12.76(3)$  Å,  $b=15.37(3)$  Å,  $c=16.00(3)$  Å;  $\alpha=68.37(3)$ ,  $\beta=66.71(3)$ ,  $\gamma=73.74(3)$ ;  $V=2644(9)$  Å<sup>3</sup>;  $Z=1$ ;  $\rho=1.540$  g cm<sup>-3</sup>;  $T=298(2)$  K;  $R_1=0.0874$ ;  $wR_2=0.1651$ ;  $GOF(F^2)=0.820$ . More crystallographic data please check the Cambridge Crystallographic Data Centre (CCDC) with entry 1887006.

**Reference:**

- [1] N. E. Brese and M. O’Keeffe, *Acta Cryst. Sect. B*, 1991, **47**, 192.
- [2] Brown, I. D.; Altermatt, D. *Acta. Cryst.* **1985**, *B41*, 244-247.
- [3] Thorp, H. H. *Inorg. Chem.* **1992**, *31*, 1585-1588.
